# Supplementary material
Source: PubMed Central journal article supplement (PMC1855828)
Supplement: jbacter_189_8_3296__1.pdf [file jbacter_189_8_3296__1.pdf]

TABLE S1. Genes required for *B. anthracis* growth, sporulation, or germination in the WAD205 mutant population.

| <b>Gene Name</b> | <b>Description*</b>                                               | <b>p value</b> |
|------------------|-------------------------------------------------------------------|----------------|
| BA0011           | glutamine amidotransferase, SNO family                            | 0.00241        |
| BA0040           | yabG protein                                                      | 0.000498       |
| BA0048           | UDP-N-acetylglucosamine pyrophosphorylase                         | 1.84E-08       |
| BA0049           | ribose-phosphate pyrophosphokinase                                | 0.000947       |
| BA0054           | stage V sporulation protein B, putative                           | 0.0015         |
| BA0055           | tetrapyrrole methylase family protein/MazG family protein         | 0.00086        |
| BA0061           | stage II sporulation protein E                                    | 0.000855       |
| BA0065           | transcriptional activator, putative, Baf family                   | 0.000871       |
| BA0075           | TIM-barrel protein, putative, NifR3 family                        | 0.0277         |
| BA0079           | phosphotransferase domain protein                                 | 0.00205        |
| BA0091           | RNA methyltransferase, TrmH family, group 3                       | 0.00357        |
| BA0107           | translation elongation factor G                                   | 0.00197        |
| BA0157           | phosphoglucosamine mutase                                         | 0.00174        |
| BA0177           | lipoprotein, putative                                             | 0.00226        |
| BA0180           | conserved domain protein                                          | 4.01E-05       |
| BA0189           | oligopeptide ABC transporter, oligopeptide-binding protein        | 0.00264        |
| BA0216           | sugar-binding transcriptional regulator, LacI family              | 0.00132        |
| BA0223           | conserved hypothetical protein                                    | 0.000597       |
| BA0240           | 4-hydroxyphenylpyruvate dioxygenase                               | 0.000648       |
| BA0309           | delta-1-pyrroline-5-carboxylate dehydrogenase, putative           | 0.00115        |
| BA0365           | Rieske 2Fe-2S iron-sulfur protein, putative                       | 0.00148        |
| BA0369           | methyl-accepting chemotaxis protein                               | 0.00124        |
| BA0371           | glycosyl hydrolase family protein                                 | 0.000248       |
| BA0379           | methyl-accepting chemotaxis protein                               | 0.00356        |
| BA0383           | ABC transporter, ATP-binding protein                              | 0.00426        |
| BA0390           | major facilitator family transporter                              | 0.000498       |
| BA0403           | conserved hypothetical protein                                    | 0.000572       |
| BA0404           | tellurite resistance protein, putative                            | 0.000914       |
| BA0410           | heavy metal-transporting ATPase                                   | 0.000825       |
| BA0411           | transporter, EamA family                                          | 0.000912       |
| BA0467           | prophage LambdaBa04, prohead protease, putative                   | 0.00105        |
| BA0468           | prophage LambdaBa04, major capsid protein, putative               | 0.000498       |
| BA0501           | PTS system, N-acetylglucosamine-specific IIBC component, putative | 0.000914       |
| BA0505           | glycosyl transferase, group 2 family protein                      | 0.000498       |
| BA0514           | chlorohydrolase family protein                                    | 0.00237        |
| BA0554           | glycine betaine transporter                                       | 0.000488       |
| BA0555           | microbial collagenase, putative                                   | 0.000597       |
| BA0572           | sensor histidine kinase                                           | 0.00384        |
| BA0584           | sensor histidine kinase                                           | 0.000805       |
| BA0595           | heavy metal-transporting ATPase                                   | 0.00176        |
| BA0629           | amino acid permease family protein                                | 0.00154        |
| BA0663           | multidrug resistance protein, putative, authentic frameshift      | 0.000488       |
| BA0675           | alcohol dehydrogenase, zinc-containing                            | 0.00264        |
| BA0679           | conserved hypothetical protein                                    | 0.000441       |
| BA0687           | conserved hypothetical protein                                    | 0.000119       |
| BA0691           | membrane protein, putative                                        | 0.000834       |
| BA0709           | spore germination protein GerLA                                   | 0.000119       |
| BA0710           | spore germination protein GerLB                                   | 0.000719       |
| BA0715           | phosphate ABC transporter, phosphate-binding protein, putative    | 0.0135         |
| BA0716           | phosphate ABC transporter, permease protein, putative             | 0.000282       |
| BA0717           | phosphate ABC transporter, permease protein, putative             | 2.43E-05       |
| BA0719           | transporter, AcrB/AcrD/AcrF family                                | 0.00152        |

|        |                                                                                |          |
|--------|--------------------------------------------------------------------------------|----------|
| BA0789 | conserved hypothetical protein                                                 | 0.0041   |
| BA0819 | germination protein gerN                                                       | 0.000914 |
| BA0839 | ABC transporter, substrate-binding protein, putative                           | 0.0018   |
| BA0872 | N-acetylmuramoyl-L-alanine amidase, family 2                                   | 0.00151  |
| BA0875 | oxygen-independent coproporphyrinogen III oxidase, putative                    | 0.00363  |
| BA0927 | conserved hypothetical protein                                                 | 0.000397 |
| BA0928 | conserved domain protein                                                       | 0.000726 |
| BA0963 | dihydroxyacetone kinase family protein                                         | 0.000678 |
| BA1012 | HD domain protein                                                              | 1.84E-08 |
| BA1027 | glycerol-3-phosphate dehydrogenase, aerobic                                    | 0.000794 |
| BA1075 | endonuclease/exonuclease/phosphatase family                                    | 0.000783 |
| BA1112 | conserved hypothetical protein                                                 | 0.000572 |
| BA1126 | transporter, EamA family                                                       | 0.00343  |
| BA1193 | oligopeptide ABC transporter, permease protein                                 | 0.0148   |
| BA1231 | dTDP-4-dehydrorhamnose reductase                                               | 0.000834 |
| BA1239 | ATP-dependent DNA helicase, UvrD/REP family                                    | 0.00328  |
| BA1299 | spermidine/putrescine ABC transporter, permease protein                        | 0.00556  |
| BA1300 | spermidine/putrescine ABC transporter, spermidine/putrescine-binding protein   | 0.002    |
| BA1302 | transporter, putative                                                          | 0.00101  |
| BA1304 | ribosomal large subunit pseudouridine synthase, RluD subfamily                 | 0.0211   |
| BA1321 | formate/nitrite transporter family protein                                     | 4.88E-06 |
| BA1341 | aminotransferase, class V                                                      | 0.00141  |
| BA1371 | ribonucleoside-diphosphate reductase, alpha subunit, group I intron-containing | 0.00189  |
| BA1389 | D-alanine-activating enzyme/D-alanine-D-alanyl carrier protein ligase          | 0.0012   |
| BA1432 | histidinol phosphatase, putative                                               | 0.00116  |
| BA1456 | sensor histidine kinase                                                        | 0.0395   |
| BA1490 | D-alanyl-D-alanine carboxypeptidase family protein                             | 0.000467 |
| BA1492 | spore maturation protein                                                       | 0.000908 |
| BA1495 | ResB protein                                                                   | 0.0012   |
| BA1496 | ResC protein                                                                   | 0.00525  |
| BA1510 | negative regulator of competence MecA, putative                                | 0.00192  |
| BA1511 | glutamate dehydrogenase                                                        | 0.00153  |
| BA1530 | stage IV sporulation protein A                                                 | 4.95E-06 |
| BA1558 | glycosyl transferase, group 1 family protein                                   | 0.000834 |
| BA1559 | polyA polymerase                                                               | 3.57E-05 |
| BA1563 | pantoate--beta-alanine ligase                                                  | 0.00155  |
| BA1568 | aspartate aminotransferase                                                     | 5.34E-05 |
| BA1583 | conserved hypothetical protein                                                 | 0.000634 |
| BA1662 | flagellar motor switch protein, putative                                       | 1.36E-05 |
| BA1669 | flagellar hook-associated protein, putative                                    | 0.00199  |
| BA1715 | flagellar biosynthetic protein FlhB, putative                                  | 2.44E-06 |
| BA1747 | hydrolase, alpha/beta fold family                                              | 5.91E-05 |
| BA1799 | proton/sodium-glutamate symporter                                              | 0.000536 |
| BA1856 | membrane protein, putative                                                     | 0.000441 |
| BA1868 | oligopeptide ABC transporter, oligopeptide-binding protein, putative           | 0.0207   |
| BA1887 | enterotoxin                                                                    | 0.00476  |
| BA1900 | BNR repeat domain protein                                                      | 0.0015   |
| BA1917 | rrf2 family protein                                                            | 0.00202  |
| BA2062 | hypothetical protein                                                           | 0.000691 |
| BA2129 | transcriptional regulator, GntR family                                         | 0.00138  |
| BA2144 | uroporphyrin-III C-methyltransferase, putative                                 | 0.0011   |
| BA2175 | arginyl-tRNA synthetase                                                        | 0.000691 |
| BA2238 | penicillin-binding protein 3                                                   | 0.00134  |
| BA2258 | lipoprotein, putative                                                          | 0.000421 |
| BA2370 | 2,3-dihydroxybenzoate-AMP ligase                                               | 0.000947 |
| BA2372 | nonribosomal peptide synthetase DhbF                                           | 0.000969 |

|        |                                                                                |          |
|--------|--------------------------------------------------------------------------------|----------|
| BA2393 | ABC transporter, permease protein, putative                                    | 0.0274   |
| BA2577 | permease, putative                                                             | 0.00137  |
| BA2644 | sporulation kinase B                                                           | 0.000255 |
| BA2688 | conserved hypothetical protein                                                 | 0.000834 |
| BA2725 | bacitracin synthetase, putative, authentic frameshift                          | 0.000691 |
| BA2975 | sugar ABC transporter, sugar-binding protein, putative                         | 0.00226  |
| BA2999 | conserved hypothetical protein                                                 | 0.000129 |
| BA3051 | conserved domain protein                                                       | 4.58E-05 |
| BA3134 | catalase, Mn-containing                                                        | 0.000834 |
| BA3199 | arsenical resistance operon repressor                                          | 0.000488 |
| BA3382 | pyruvate kinase                                                                | 0.0026   |
| BA3394 | protein-tyrosine phosphatase-like protein                                      | 0.00328  |
| BA3428 | gluconate kinase                                                               | 0.000634 |
| BA3438 | alcohol dehydrogenase, zinc-containing                                         | 0.000834 |
| BA3534 | iron compound ABC transporter, permease protein                                | 0.00152  |
| BA3556 | major facilitator family transporter                                           | 0.00285  |
| BA3584 | microbial collagenase, putative                                                | 0.00115  |
| BA3604 | argininosuccinate lyase                                                        | 0.000834 |
| BA3624 | molybdopterin biosynthesis protein MoeB, putative                              | 0.000597 |
| BA3660 | serine protease                                                                | 0.00188  |
| BA3705 | sodium/proline symporter family protein                                        | 3.57E-05 |
| BA3737 | N-acetylmuramoyl-L-alanine amidase, family 2                                   | 0.0395   |
| BA3744 | transketolase                                                                  | 2.46E-05 |
| BA3763 | hypothetical protein                                                           | 0.000397 |
| BA3772 | conserved hypothetical protein, authentic frameshift                           | 0.00141  |
| BA3778 | prophage LambdaBa01, major tail protein, putative                              | 0.0018   |
| BA3820 | hypothetical protein                                                           | 0.000775 |
| BA3872 | peptidase T                                                                    | 0.00131  |
| BA3879 | sensory box/GGDEF family protein                                               | 0.00141  |
| BA3923 | conserved hypothetical protein                                                 | 4.38E-07 |
| BA3927 | lipoprotein, Bmp family                                                        | 0.00061  |
| BA3933 | metallo-beta-lactamase family protein                                          | 0.000805 |
| BA3942 | zinc protease, insulinase family                                               | 0.000507 |
| BA3946 | riboflavin biosynthesis protein RibC                                           | 0.00397  |
| BA3982 | ribosomal protein S16                                                          | 0.000914 |
| BA3983 | signal recognition particle protein                                            | 2.15E-06 |
| BA4007 | phosphopantothenoylcysteine decarboxylase/phosphopantothenate--cysteine ligase | 0.00115  |
| BA4048 | UDP-N-acetylenolpyruvoylglucosamine reductase                                  | 0.000908 |
| BA4050 | stage V sporulation protein E                                                  | 0.000691 |
| BA4053 | UDP-N-acetylmuramoylalanyl-D-glutamyl-2,6-diaminopimelate ligase               | 0.000648 |
| BA4077 | hypothetical protein                                                           | 0.000441 |
| BA4078 | phage minor structural protein                                                 | 3.57E-05 |
| BA4079 | conserved hypothetical protein                                                 | 0.000247 |
| BA4157 | pyruvate carboxylase                                                           | 0.0135   |
| BA4166 | GTP-binding protein TypA                                                       | 0.000571 |
| BA4168 | inositol monophosphatase family protein                                        | 0.00422  |
| BA4228 | maltosaccharide ABC transporter, permease protein                              | 0.0011   |
| BA4251 | translation initiation factor, putative, aIF-2BI family                        | 0.00241  |
| BA4313 | transcriptional regulator, Fur family                                          | 0.0108   |
| BA4336 | biotin synthetase                                                              | 0.000507 |
| BA4339 | 8-amino-7-oxononanoate synthase                                                | 6.18E-05 |
| BA4341 | adenosylmethionine--8-amino-7-oxononanoate aminotransferase                    | 0.000888 |
| BA4385 | dihydrolipoamide dehydrogenase                                                 | 0.000914 |
| BA4386 | butyrate kinase                                                                | 0.00155  |
| BA4396 | stage IV sporulation protein B                                                 | 0.000536 |
| BA4449 | glycine cleavage system T protein                                              | 0.00148  |

|        |                                                               |          |
|--------|---------------------------------------------------------------|----------|
| BA4451 | conserved hypothetical protein                                | 1.01E-05 |
| BA4466 | comG operon protein 1                                         | 0.000507 |
| BA4515 | RNA polymerase sigma-43 factor                                | 0.00188  |
| BA4528 | HDIG domain protein                                           | 0.002    |
| BA4530 | sporulation protein                                           | 0.00117  |
| BA4535 | conserved hypothetical protein                                | 0.01     |
| BA4539 | chaperone protein DnaK                                        | 0.000248 |
| BA4546 | spore protease                                                | 0.000488 |
| BA4574 | alkaline phosphatase                                          | 0.000969 |
| BA4601 | O-acetylserine lyase                                          | 0.000507 |
| BA4609 | peptidase, U32 family                                         | 0.000578 |
| BA4610 | peptidase, U32 family                                         | 0.000691 |
| BA4643 | stage V sporulation protein B                                 | 0.000492 |
| BA4654 | membrane protein, putative, authentic frameshift              | 3.32E-05 |
| BA4668 | ABC transporter, permease protein                             | 0.000597 |
| BA4688 | stage II sporulation protein B, putative                      | 0.000467 |
| BA4691 | conserved hypothetical protein                                | 0.0035   |
| BA4698 | glutamyl-tRNA reductase                                       | 0.0018   |
| BA4718 | major facilitator family transporter                          | 0.000536 |
| BA4728 | N-acyl-D-amino-acid deacylase family protein                  | 0.000248 |
| BA4744 | membrane protein, putative                                    | 1.01E-05 |
| BA4763 | long-chain-fatty-acid--CoA ligase                             | 0.000587 |
| BA4794 | MutS2 family protein                                          | 0.00101  |
| BA4827 | glyceraldehyde 3-phosphate dehydrogenase                      | 0.00117  |
| BA4831 | DNA polymerase I                                              | 0.000783 |
| BA4837 | malate dehydrogenase                                          | 0.000634 |
| BA4838 | isocitrate dehydrogenase, NADP-dependent                      | 0.000255 |
| BA4839 | citrate synthase CitZ                                         | 0.00133  |
| BA4889 | conserved hypothetical protein                                | 0.000597 |
| BA4901 | septation ring formation regulator                            | 0.00455  |
| BA4940 | FtsK/SpoIIIE family protein                                   | 0.00368  |
| BA4953 | pullulanase, putative                                         | 0.00155  |
| BA4996 | ABC transporter, permease protein, putative                   | 0.00042  |
| BA5041 | conserved hypothetical protein, authentic point mutation      | 0.000914 |
| BA5042 | conserved hypothetical protein                                | 4.38E-07 |
| BA5099 | pyridoxal phosphate-dependent enzyme, putative                | 0.000726 |
| BA5120 | glycogen synthase                                             | 0.000507 |
| BA5152 | UTP-glucose-1-phosphate uridylyltransferase                   | 8.72E-06 |
| BA5156 | conserved hypothetical protein                                | 0.00377  |
| BA5161 | cell wall surface anchor domain protein, authentic frameshift | 0.000571 |
| BA5256 | methyl-accepting chemotaxis protein                           | 0.00101  |
| BA5261 | amino acid permease family protein                            | 0.00123  |
| BA5268 | cytolysin immunity CylI domain protein                        | 0.000805 |
| BA5269 | hypothetical protein                                          | 0.00101  |
| BA5278 | methionyl-tRNA synthetase, putative                           | 0.00127  |
| BA5305 | conserved domain protein                                      | 0.000129 |
| BA5326 | lipoprotein, putative                                         | 0.00193  |
| BA5328 | iron compound ABC transporter, permease protein               | 0.000507 |
| BA5335 | carboxylesterase                                              | 0.00142  |
| BA5360 | phage major capsid protein, HK97 family                       | 0.000969 |
| BA5361 | hypothetical protein                                          | 0.0178   |
| BA5388 | TPR domain protein                                            | 0.0026   |
| BA5399 | conserved hypothetical protein                                | 0.000295 |
| BA5414 | carboxyl-terminal protease                                    | 0.00137  |
| BA5436 | polysaccharide deacetylase, putative                          | 0.00454  |
| BA5455 | conserved hypothetical protein                                | 0.000993 |

|         |                                               |          |
|---------|-----------------------------------------------|----------|
| BA5470  | sulfatase                                     | 0.00061  |
| BA5483  | conserved hypothetical protein                | 0.00343  |
| BA5492  | competence transcription factor, degenerate   | 0.014    |
| BA5512  | UDP-N-acetyl-D-mannosamine dehydrogenase      | 0.00142  |
| BA5516  | conserved domain protein                      | 0.000691 |
| BA5517  | hypothetical protein                          | 0.000538 |
| BA5518  | glycosyl transferase, group 1 family protein  | 0.00199  |
| BA5581  | stage 0 sporulation protein F                 | 8.55E-06 |
| BA5591  | cardiolipin synthetase domain protein         | 0.0018   |
| BA5597  | DNA-binding response regulator                | 0.000923 |
| BA5599  | ABC transporter, permease protein, putative   | 0.000536 |
| BA5600  | ABC transporter, ATP-binding protein          | 0.00107  |
| BA5607  | hypothetical protein                          | 0.0149   |
| BA5645  | xanthine/uracil permease family protein       | 0.000446 |
| BA5655  | homoserine O-succinyltransferase              | 0.00115  |
| BA5673  | methyl-accepting chemotaxis protein           | 0.00357  |
| BA5676  | polysaccharide biosynthesis protein, putative | 0.000648 |
| BA5689  | membrane protein, putative                    | 0.000923 |
| BA5694  | osmoprotectant transporter, BCCT family       | 0.000726 |
| BA5695  | nitric-oxide synthase, oxygenase subunit      | 0.000587 |
| BA5700  | UDP-glucose 4-epimerase                       | 0.000975 |
| BA5705  | guanosine monophosphate reductase             | 0.000787 |
| BA5713  | YycH protein                                  | 0.000283 |
| BA5714  | sensory box histidine kinase YycG             | 0.00285  |
| BA5717  | replicative DNA helicase                      | 0.000648 |
| BA5726  | mechanosensitive ion channel family protein   | 0.00187  |
| BA5728  | conserved hypothetical protein                | 0.000316 |
| BA5730  | sporulation initiation inhibitor protein Soj  | 0.0131   |
| pXO2-29 | hypothetical protein                          | 0.00127  |
| pXO2-38 | plasmid replication protein                   | 0.000805 |
| pXO2-56 | capsule biosynthesis protein CapA             | 0.00154  |
| pXO2-81 | hypothetical protein                          | 5.42E-05 |
| pXO2-84 | hypothetical protein                          | 0.000787 |

\* Gene descriptions derived from The Institute for Genomic Research (TIGR) genome annotation (19).
